# Supplementary material for: Improve Pasture or Feed Grain? Greenhouse Gas Emissions, Profitability, and Resource Use for Nelore Beef Cattle in Brazil’s Cerrado and Amazon Biomes
Source: PubMed Central journal article supplement (PMC7459503; doi:10.3390/ani10081386), 2020-08-10
Supplement: animals-10-01386-s001.pdf [file animals-10-01386-s001.pdf]

1 *Article*

2 **Improve pasture or feed grain?: Greenhouse gas emissions, profitability, and resource**  
3 **use for Nelore beef cattle in Brazil's Cerrado and Amazon biomes**

4 **Luana Molossi <sup>1</sup>, Aaron Kinyu Hoshide <sup>2</sup>, Lorena Machado Pedrosa <sup>1</sup>, André Soares de Oliveira <sup>3</sup> and Daniel Carneiro de Abreu <sup>1,\*</sup>**

5 <sup>1</sup> AgriSciences, Universidade Federal de Mato Grosso, Sinop, MT 78555-267, Brazil; luana\_molossi@hotmail.com (L.M.) pedrosa@agronoma.eng.br (L.M.P.);  
6 abreu@ufmt.br (D.C.A.)

7 <sup>2</sup> Faculty Associate, School of Economics, The University of Maine, Orono, ME 04469 USA; aaron.hoshide@maine.edu

8 <sup>3</sup> Dairy Cattle Research Lab, Universidade Federal de Mato Grosso, Sinop, MT 78555-267, Brazil; andresoli@uol.com.br

9 \* Correspondence: abreu@ufmt.br; Tel.: +55-66-3515-8574

10 Received: 5/23/20

11 **Supplemental Materials**

12

13 **Table S1.** General costs, livestock expenses/year (US\$/head), commodity prices (US\$/metric ton of dry matter), cattle prices, useful life of capital (years), salvage value (%)  
 14 of initial value), interest rate (%) and fertilizer prices (US\$/kg) for simulated systems in the Amazon and Cerrado biomes, Brazil.

| Item                                               | Cerrado and Amazon |
|----------------------------------------------------|--------------------|
| General                                            |                    |
| Diesel fuel (US\$/liter)                           | 0.86               |
| Electricity (US\$/liter)                           | 0.11               |
| Labor wage (US\$/hour)                             | 3.50               |
| Veterinary and medicine (US\$/head)                | 3.14               |
| Animal hauling (\$/head)                           | 6.16               |
| Miscellaneous (\$/head)                            | 2.25               |
| Buying prices (US\$/metric ton of dry matter)      |                    |
| Soybean meal 44%                                   | 292.55             |
| Corn grain                                         | 70.92              |
| Minerals                                           | 431.83             |
| Cattle prices                                      |                    |
| Finished cattle (\$/kg)                            | 1.22               |
| Cull cow (US\$/kg of live weight)                  | 1.14               |
| Bred heifer (US\$/animal)                          | 233.00             |
| Feeder cattle (US\$/kg of live weight)             | 1.35               |
| Salvage value (%)                                  |                    |
| Machinery                                          | 10.0               |
| Structures                                         | 2.5                |
| Interest rate (% per year)                         |                    |
| Medium term                                        | 6.0                |
| Long term                                          | 6.0                |
| Fertilizer prices                                  |                    |
| Nitrogen (US\$/kg N)                               | 1.04               |
| Phosphate (US\$/kg P <sub>2</sub> O <sub>5</sub> ) | 1.31               |
| Potash (US\$/kg K <sub>2</sub> O)                  | 0.96               |
| Lime (US\$/t)                                      | 28.06              |

15

16

17

**Table S2.** Soil characteristics of the simulated systems for the Cerrado and Amazon biomes, Brazil.

| <b>Soil attributes</b>                          | <b>Cerrado</b> | <b>Amazon</b>   |
|-------------------------------------------------|----------------|-----------------|
| Soil type                                       | Shallow loam   | Deep sandy loam |
| Available water holding capacity (mm)           | 260            | 400             |
| Fraction of available water when stress begins  | 0.5            | 0.5             |
| Bare soil albedo                                | 0.13           | 0.13            |
| Soil evaporation coefficient (mm)               | 6              | 6               |
| Moist bulk density of soil (g/cm <sup>3</sup> ) | 1.5            | 1.5             |
| Organic carbon concentration (%)                | 0.5            | 1.37            |
| Silt content (%)                                | 9              | 6               |
| Clay content (%)                                | 26             | 17              |
| Sand content (%)                                | 65             | 77              |
| Runoff curve number w/ row crops                | 73             | 73              |
| Whole profile drainage rate coefficient         | 0.48           | 0.48            |
| pH                                              | 6              | 4.9             |
| Exchangeable acidity                            | 3.5            | 3.5             |

18

19

20 **Table S3.** Annual average emissions of greenhouse gases (GHG) and natural resource use per farm simulated in IFSM for the extensive beef system, pasture seeding  
 21 (PS), pasture fertilization (PF), and grain supplementation (GS) in the Cerrado and Amazon biomes, Brazil.

| Impacts of simulated beef systems                        | ----- Simulated Scenarios in Cerrado ----- |                  |                  |                   | ----- Simulated Scenarios in Amazon ----- |                   |                   |                   |
|----------------------------------------------------------|--------------------------------------------|------------------|------------------|-------------------|-------------------------------------------|-------------------|-------------------|-------------------|
|                                                          | Extensive                                  | PS               | PF               | GS                | Extensive                                 | PS                | PF                | GS                |
| Greenhouse Gas Emissions<br>(kg CO <sub>2</sub> eq/farm) |                                            |                  |                  |                   |                                           |                   |                   |                   |
| Animal emissions                                         | 2,095,160                                  | 4,448,213        | 4,444,428        | 4,330,238         | 2,087,089                                 | 4,441,150         | 4,437,194         | 4,332,194         |
| Manure emissions                                         | 19,606                                     | 43,295           | 43,303           | 42,291            | 18,053                                    | 41,765            | 41,708            | 40,893            |
| Direct and indirect land emissions                       | 511,481                                    | 1,016,972        | 1,057,072        | 919,331           | 544,182                                   | 859,038           | 884,321           | 883,582           |
| Anthropogenic carbon dioxide emission                    | 4,463                                      | 84,181           | 80,206           | 4,463             | 4,463                                     | 84,181            | 80,206            | 4,463             |
| Production of resource inputs                            | 221,014                                    | 533,372          | 557,918          | 554,432           | 153,003                                   | 463,842           | 485,978           | 491,297           |
| <b>Total</b>                                             | <b>2,851,724</b>                           | <b>6,126,033</b> | <b>6,182,927</b> | <b>5,850,755</b>  | <b>2,806,790</b>                          | <b>5,889,976</b>  | <b>5,929,407</b>  | <b>5,752,429</b>  |
| Water Use (Mg/farm)                                      |                                            |                  |                  |                   |                                           |                   |                   |                   |
| Feed production, rainfall                                | 9,545,749                                  | 8,305,312        | 8,322,549        | 9,786,869         | 15,380,154                                | 14,548,816        | 14,603,959        | 15,437,069        |
| Drinking                                                 | 12,230                                     | 22,349           | 22,514           | 24,526            | 11,183                                    | 20,816            | 20,952            | 23,185            |
| Production of purchased feed and inputs                  | 483,037                                    | 1,224,028        | 1,140,287        | 1,334,463         | 293,491                                   | 929,648           | 938,812           | 1,153,025         |
| <b>Total</b>                                             | <b>10,041,016</b>                          | <b>9,551,689</b> | <b>9,485,350</b> | <b>11,145,858</b> | <b>15,684,828</b>                         | <b>15,499,280</b> | <b>15,563,723</b> | <b>16,613,279</b> |
| Energy Use (MJ/farm)                                     |                                            |                  |                  |                   |                                           |                   |                   |                   |
| Feed production                                          | 62,319                                     | 179,584          | 124,637          | 62,319            | 62,319                                    | 180,137           | 124,637           | 62,319            |
| Production of resource inputs                            | 1,733,015                                  | 4,485,869        | 4,962,873        | 4,217,912         | 170,610                                   | 3,934,078         | 4,392,008         | 3,704,807         |
| <b>Total</b>                                             | <b>1,795,334</b>                           | <b>4,665,453</b> | <b>5,087,510</b> | <b>4,280,231</b>  | <b>232,929</b>                            | <b>4,114,215</b>  | <b>4,516,645</b>  | <b>3,767,126</b>  |
| Reactive Nitrogen Loss (kg/farm)                         |                                            |                  |                  |                   |                                           |                   |                   |                   |
| Ammonia emission                                         | 6,952                                      | 15,222           | 15,238           | 16,887            | 4,680                                     | 11,654            | 11,634            | 13,342            |
| Nitrate leaching and runoff                              | 21,812                                     | 61,066           | 65,607           | 44,915            | 20,083                                    | 41,195            | 44,816            | 42,219            |
| De-nitrification emissions                               | 3,587                                      | 6,125            | 6,321            | 5,791             | 7,747                                     | 10,668            | 10,852            | 10,935            |
| Fuel combustion emissions                                | 13                                         | 36               | 25               | 13                | 13                                        | 37                | 25                | 13                |
| Production of resource inputs                            | 771                                        | 1,755            | 1,801            | 2,384             | 491                                       | 1,462             | 1,500             | 2,135             |
| <b>Total</b>                                             | <b>33,135</b>                              | <b>84,204</b>    | <b>88,992</b>    | <b>69,990</b>     | <b>33,014</b>                             | <b>65,016</b>     | <b>68,827</b>     | <b>68,644</b>     |

22

23

24 **Table S4.** Annual average emissions of greenhouse gases (GHG) and natural resource use per hectare simulated in IFSM for the extensive beef system, pasture seeding  
 25 (PS), pasture fertilization (PF), and grain supplementation (GS) in the Cerrado and Amazon biomes, Brazil.

| Impacts of simulated beef systems                   | ----- Simulated Scenarios in Cerrado ----- |              |              |              | ----- Simulated Scenarios in Amazon ----- |               |               |               |
|-----------------------------------------------------|--------------------------------------------|--------------|--------------|--------------|-------------------------------------------|---------------|---------------|---------------|
|                                                     | Extensive                                  | PS           | PF           | GS           | Extensive                                 | PS            | PF            | GS            |
| Greenhouse Gas Emissions (kg CO <sub>2</sub> eq/ha) |                                            |              |              |              |                                           |               |               |               |
| Animal emissions                                    | 1,746                                      | 3,707        | 3,704        | 3,609        | 1,739                                     | 3,701         | 3,698         | 3,610         |
| Manure emissions                                    | 16                                         | 36           | 36           | 35           | 15                                        | 35            | 35            | 34            |
| Direct and indirect land emissions                  | 426                                        | 847          | 881          | 766          | 453                                       | 716           | 737           | 736           |
| Anthropogenic carbon dioxide emission               | 4                                          | 70           | 67           | 4            | 4                                         | 70            | 67            | 4             |
| Production of resource inputs                       | 184                                        | 444          | 465          | 462          | 128                                       | 387           | 405           | 409           |
| <b>Total</b>                                        | <b>2,376</b>                               | <b>5,104</b> | <b>5,153</b> | <b>4,876</b> | <b>2,339</b>                              | <b>4,909</b>  | <b>4,942</b>  | <b>4,793</b>  |
| Water Use (Mg/ha)                                   |                                            |              |              |              |                                           |               |               |               |
| Feed production, rainfall                           | 7,955                                      | 6,921        | 6,935        | 8,156        | 12,817                                    | 12,124        | 12,170        | 12,864        |
| Drinking                                            | 10                                         | 19           | 19           | 20           | 9                                         | 17            | 17            | 19            |
| Production of purchased feed and inputs             | 403                                        | 1,020        | 950          | 1,112        | 245                                       | 775           | 782           | 961           |
| <b>Total</b>                                        | <b>8,368</b>                               | <b>7,960</b> | <b>7,904</b> | <b>9,288</b> | <b>13,071</b>                             | <b>12,916</b> | <b>12,969</b> | <b>13,844</b> |
| Energy Use (MJ/ha)                                  |                                            |              |              |              |                                           |               |               |               |
| Feed production                                     | 52                                         | 150          | 104          | 52           | 52                                        | 150           | 104           | 52            |
| Production of resource inputs                       | 1,444                                      | 3,738        | 4,136        | 3,515        | 142                                       | 3,278         | 3,660         | 3,087         |
| <b>Total</b>                                        | <b>1,496</b>                               | <b>3,888</b> | <b>4,240</b> | <b>3,567</b> | <b>194</b>                                | <b>3,428</b>  | <b>3,764</b>  | <b>3,139</b>  |
| Reactive Nitrogen Loss (kg/ha)                      |                                            |              |              |              |                                           |               |               |               |
| Ammonia emission                                    | 5.79                                       | 12.69        | 12.70        | 14.07        | 3.90                                      | 9.71          | 9.70          | 11.12         |
| Nitrate leaching and runoff                         | 18.18                                      | 50.89        | 54.67        | 37.43        | 16.74                                     | 34.33         | 37.35         | 35.18         |
| De-nitrification emissions                          | 2.99                                       | 5.10         | 5.27         | 4.83         | 6.46                                      | 8.89          | 9.04          | 9.11          |
| Fuel combustion emissions                           | 0.011                                      | 0.030        | 0.021        | 0.011        | 0.011                                     | 0.031         | 0.021         | 0.011         |
| Production of resource inputs                       | 0.64                                       | 1.46         | 1.50         | 1.99         | 0.41                                      | 1.22          | 1.25          | 1.78          |
| <b>Total</b>                                        | <b>27.61</b>                               | <b>70.17</b> | <b>74.16</b> | <b>58.33</b> | <b>27.52</b>                              | <b>54.18</b>  | <b>57.36</b>  | <b>57.20</b>  |

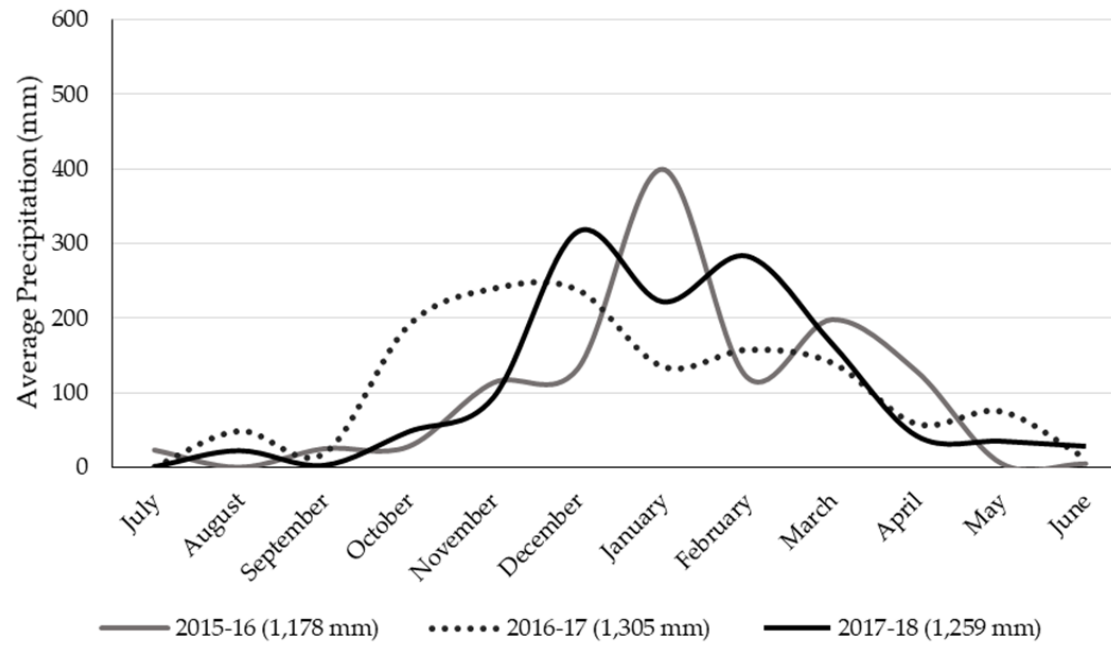

27

28

29

**Figure S1.** Precipitation at cooperating farm and Cuiabá weather stations (2015-2018) in the Cerrado biome.

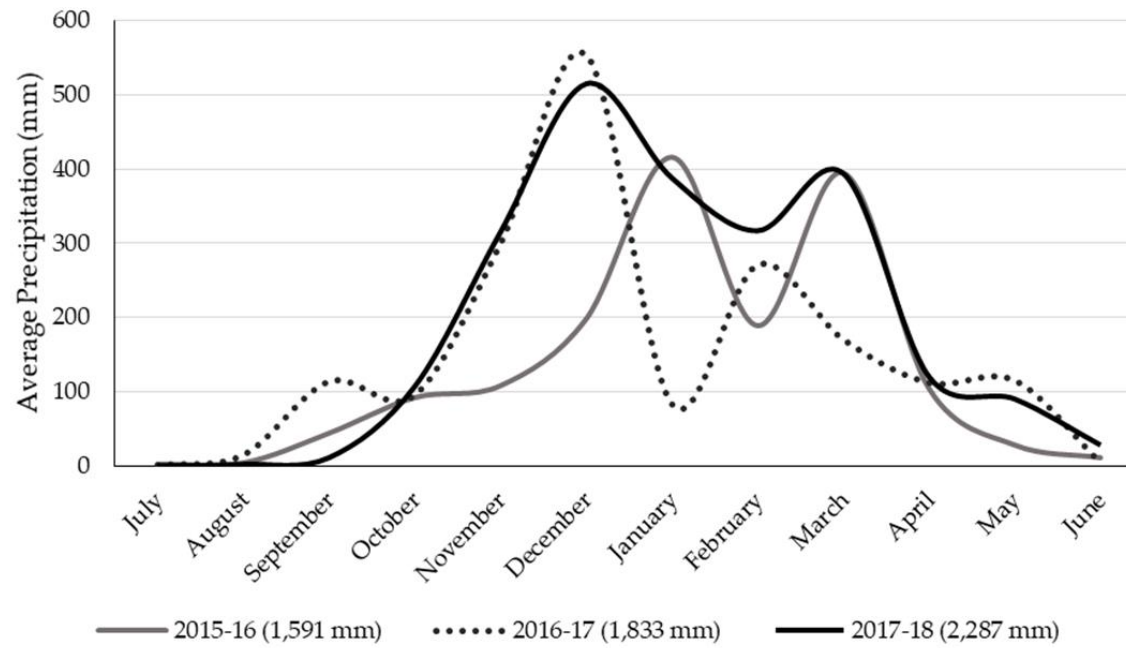

30

31

32

**Figure S2.** Precipitation at the cooperating farm weather station (2015-2018) in the Amazon biome.

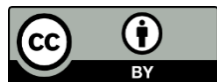

© 2020 by the authors. Submitted for possible open access publication under the terms and conditions of the Creative Commons Attribution (CC BY) license (<http://creativecommons.org/licenses/by/4.0/>).

33
